# Supplementary material for: A Comparative Analysis of the Lyve-SET Phylogenomics Pipeline for Genomic Epidemiology of Foodborne Pathogens
Source: PubMed Central journal article supplement (PMC5346554; doi:10.3389/fmicb.2017.00375), 2017-03-13

***L. monocytogenes***

| Pipeline     | y=mx+b        | R <sup>2</sup> |
|--------------|---------------|----------------|
| kSNP         | y=0.86x-0.49  | 0.87           |
| RealPhy      | y=0.72x+0.24  | 0.89           |
| SNP-Pipeline | y=1.0x+8.0    | 0.50           |
| SNVPhyl      | y=0.69x-0.063 | 0.88           |

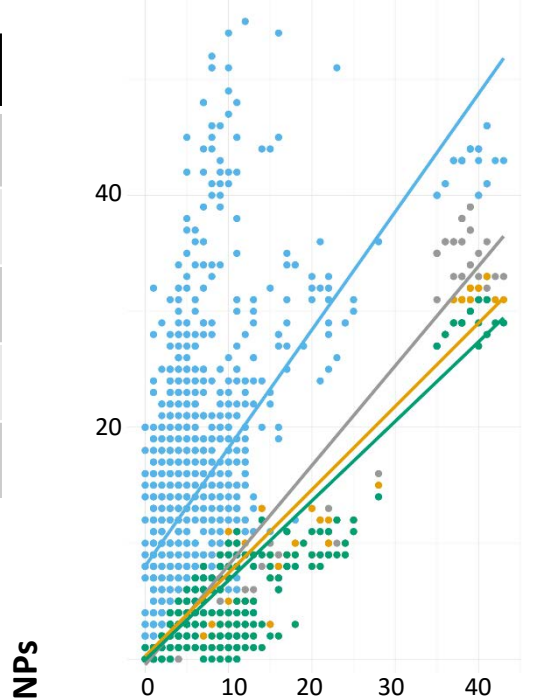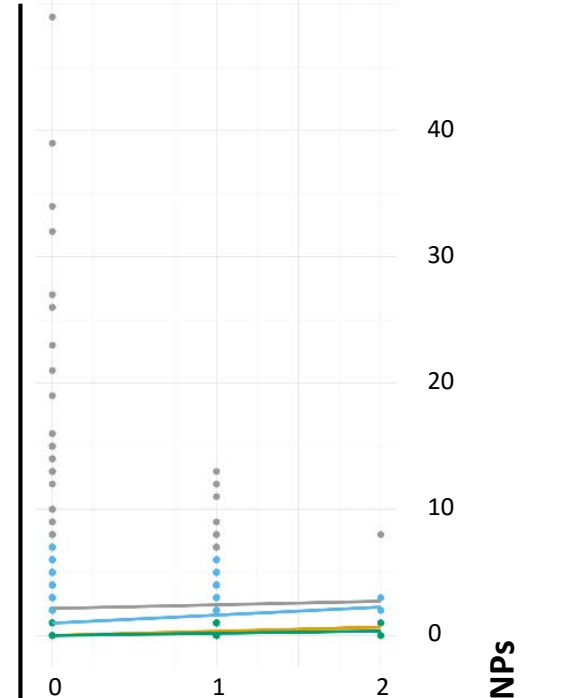

***S. enterica***

| Pipeline     | y=mx+b         | R <sup>2</sup> |
|--------------|----------------|----------------|
| kSNP         | y=0.29x+2.1    | 0.0011         |
| RealPhy      | y=0.33x+0.0080 | 0.28           |
| SNP-Pipeline | y=0.64x+0.98   | 0.048          |
| SNVPhyl      | y=0.18x+0.0052 | 0.14           |

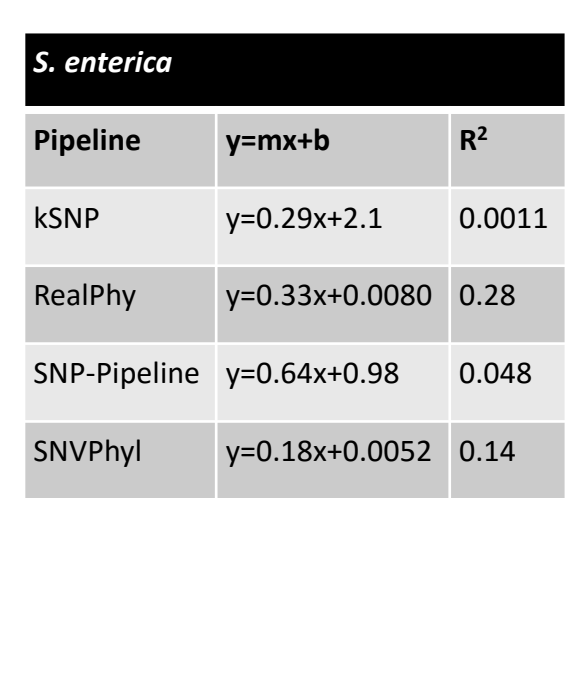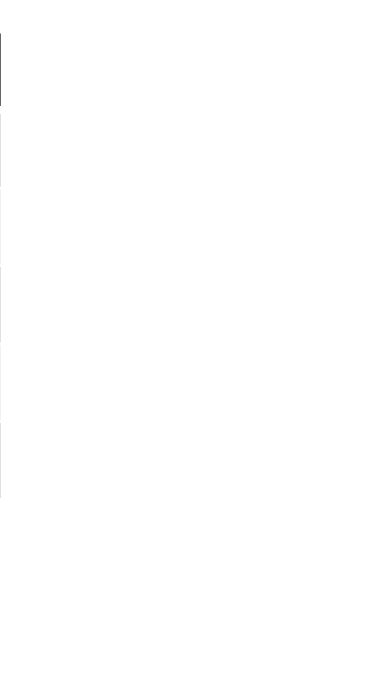

***E. coli***

| Pipeline     | y=mx+b       | R <sup>2</sup> |
|--------------|--------------|----------------|
| kSNP         | y=1.0x+1.6   | 0.71           |
| RealPhy      | y=1.3x-0.41  | 0.94           |
| SNP-Pipeline | y=1.5x+3.8   | 0.70           |
| SNVPhyl      | y=0.99x+0.15 | 0.98           |

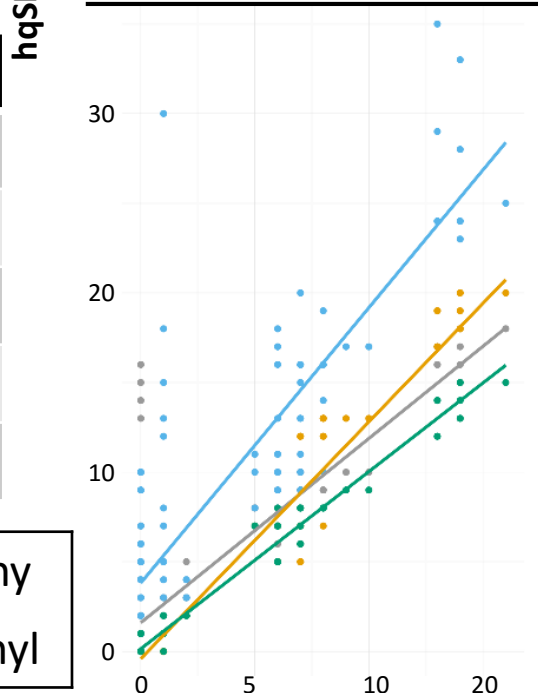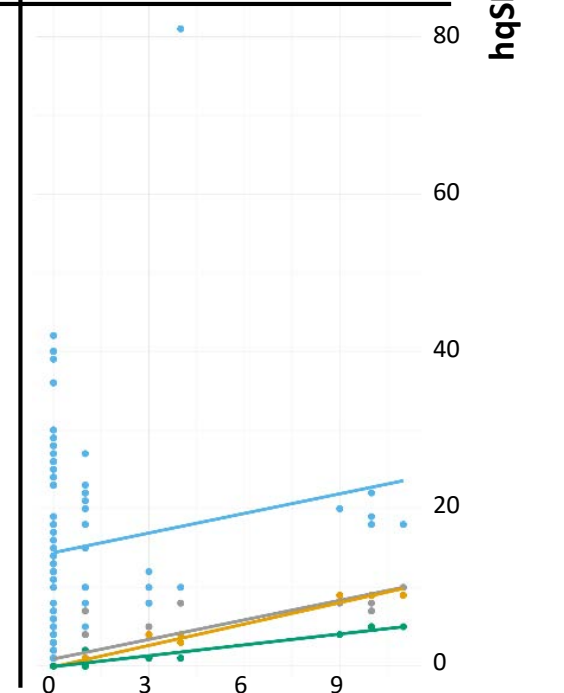

***C. jejuni***

| Pipeline     | y=mx+b        | R <sup>2</sup> |
|--------------|---------------|----------------|
| kSNP         | y=0.83x+0.90  | 0.64           |
| RealPhy      | y=0.91x-0.097 | 0.96           |
| SNP-Pipeline | y=0.83x+14    | 0.02           |
| SNVPhyl      | y=0.46x-0.067 | 0.93           |

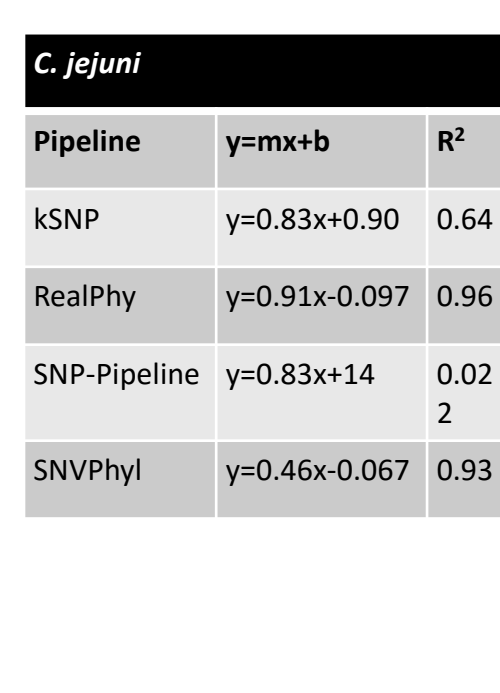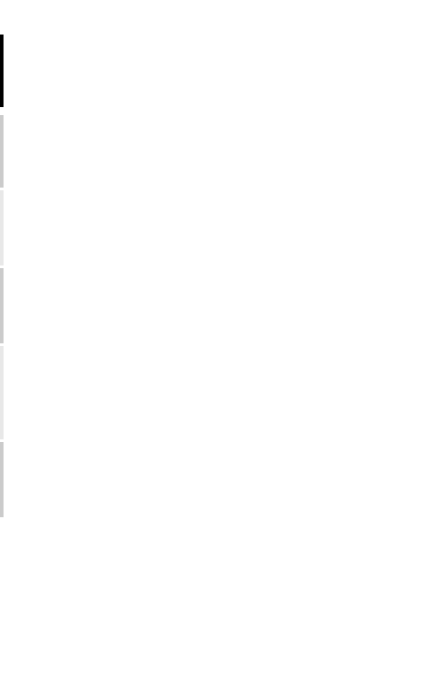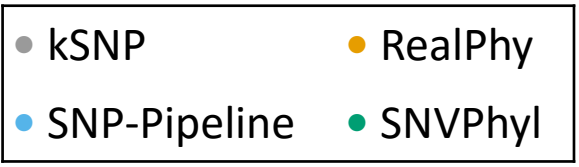

Supplement: Image1.pdf [file Image1.pdf]
